# Supplementary material for: Smoking cessation subjects in Beijing communities were isolated at home during the COVID-19 pandemic-—Study on the influence of smoking behaviour and willingness to quit smoking
Source: Research Square preprint supplement (doi:10.21203/rs.3.rs-114865/v1), 2020-12-09
Supplement: Supplementary file 1 [file 3b9cf7a98ca904b3df4388b4.docx]

**Smoking cessation subjects in Beijing communities were isolated at home during the COVID-19 pandemic-—Study on the influence of smoking behaviour and willingness to quit smoking**

Qianying Jin1, Kun Qiao1, Han Liu1, Hanqiao Ma2, Xinyuan Bai1, Xinran Qi3, Xingming Li1

1School of Public Health, Capital Medical University

2 School of Medical Humanities, Capital Medical University

3 School of Nursing, Capital Medical University

The corresponding author: Xingming Li

You An Men Wai Xitoutiao 10, Beijing, China, 100069 (P.N.) Tel: 86-10-83911602/Fax: 86-10-83911602. libright2003@163.com

新型冠状病毒肺炎居家自我隔离对戒烟者心理和戒烟行为影响调查

××先生/女士：

您好，我是中日医院和首都医科大学戒烟项目组成员××，感谢您一直参加我们的戒烟活动。给您去电话的目的是想了解一下，您因新型冠状病毒肺炎居家隔离，对您戒烟心理和戒烟活动影响，不知您是否方便接受我们一个简单的电话随访？（**如果不同意，则退出，再约下一位但是需要把失访情况记好。**）非常感谢您支持，我们随访会占用您5-10分钟宝贵时间，结束会给您电话充10元话费作为纪念。再次感谢您对我们戒烟活动的参与。

首都医科大学社区戒烟项目组

2020/2/10

问卷编号（建议提前根据基线问卷编号编号，例如若基线问卷编号为350，则本问卷为350-1）：

【1】姓名：

【2】电话：

【3】您最近半个多月，每天在家待的时间是：

A.几乎是全天

B.80%-90%的时间

C.50%-80%以上时间

D.50%以下时间

【4】以下哪些词语来形容最近疫情给您带来的心理感受？ （**可以多选**）

A.怀疑

B.焦虑

C.恐慌

D.抑郁

E.平静

F.和平常差不多

【5】当前，您是否已经完全戒烟成功？

A.是（若选A， 请跳至第6题）

B.否（若选B， 请跳至第7题）

【6】虽然已经戒烟，您是否因为疫情又有了想吸烟的想法（**也就是复吸**）？

A.是（**调查到此结束**）

B.否（**调查到此结束**）

【7】每日吸烟量______支

【8】请您根据最近半年以来的吸烟情况回答以下问题

| 8.1您早晨醒来后多长时间吸第1支烟 | >60分钟 | 31-60分钟 | 6-30分钟 | ≤5分钟 |
| --- | --- | --- | --- | --- |
| 8.2您是否在许多禁烟场所感到很难控制吸烟的需要? | 否 | 是 |  |  |
| 8.3您最不想放弃的是哪一支烟? | 其他时间 | 早晨第一支 |  |  |
| 8.4您每天吸多少烟? | ≤10支 | 11-20支 | 21-30支 | ≥31支 |
| 8.5您是否在早晨醒来后的第1小时内吸烟最多? | 否 | 是 |  |  |
| 8.6如果您患病卧床是否还会吸烟? | 否 | 是 |  |  |

【9】若您当前仍在吸烟，促使您产生吸烟行为的主要原因是（**此处可多选**）：

A．提神醒脑

B．消愁解闷

C．空闲消遣

D．交际应酬

E．模仿好奇

F．长辈影响

G．缓解压力

H．其他，请说明________________

【10】您是否愿意戒烟？

A.是（接下一题）

B.否（**若选B，调查到此结束**）

【11】戒烟意愿评估

| 序号 | 问题描述 | 非常符合 | 比较符合 | 一般 | 比较  不符合 | 非常  不符合 |
| --- | --- | --- | --- | --- | --- | --- |
| 11.1 | 我愿意戒烟 |  |  |  |  |  |
| 11.2 | 如果我尽力去做的话，一定能戒烟成功 |  |  |  |  |  |
| 11.3 | 对我来说，达到戒烟目标是轻而易举的 |  |  |  |  |  |
| 11.4 | 我有自信能有效地应付任何戒烟带来的不适症状 |  |  |  |  |  |
| 11.5 | 我能冷静地面对戒烟的困难，因为我信赖自己 |  |  |  |  |  |
| 11.6 | 面对戒烟带来的烦躁、苦恼、不适时，我能找到合适的方法排解 |  |  |  |  |  |
| 11.7 | 即使会感觉非常抑郁和悲伤，也不能阻止我戒烟 |  |  |  |  |  |
| 11.8 | 即使会非常焦虑，坐立不安，也不能改变我的戒烟决定 |  |  |  |  |  |
| 11.9 | 不管有多困难，一旦戒烟，我绝不允许自己再吸烟 |  |  |  |  |  |
| 11.10 | 我不会让任何人或事物阻挡我的戒烟之路 |  |  |  |  |  |

感谢您的参与和支持！

调查员（名字）：
